# Supplementary material
Source: PubMed Central journal article supplement (PMC6510979)
Supplement: NIHMS1013477-supplement-Supplemental.pdf [file NIHMS1013477-supplement-Supplemental.pdf]

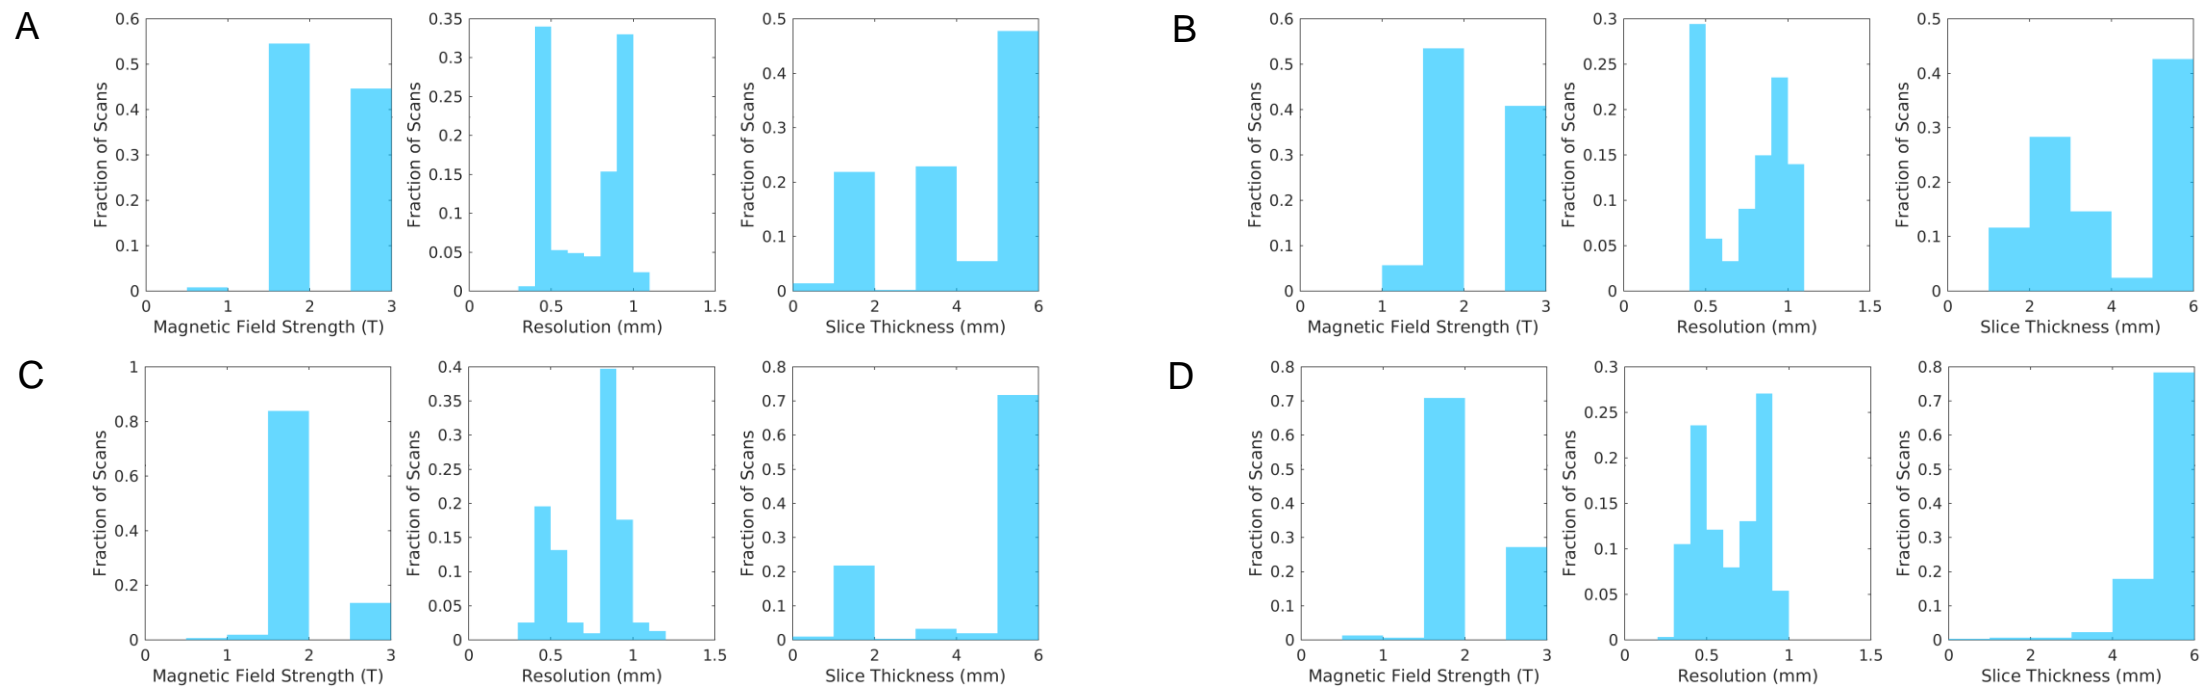

Supplementary Figure 1. Magnetic field strength, resolution, and slice thickness of (A) HUP, (B) TCIA, (C) MGH, and (D) BWH pre-operative cohorts for FLAIR and T1 post-contrast MR images.

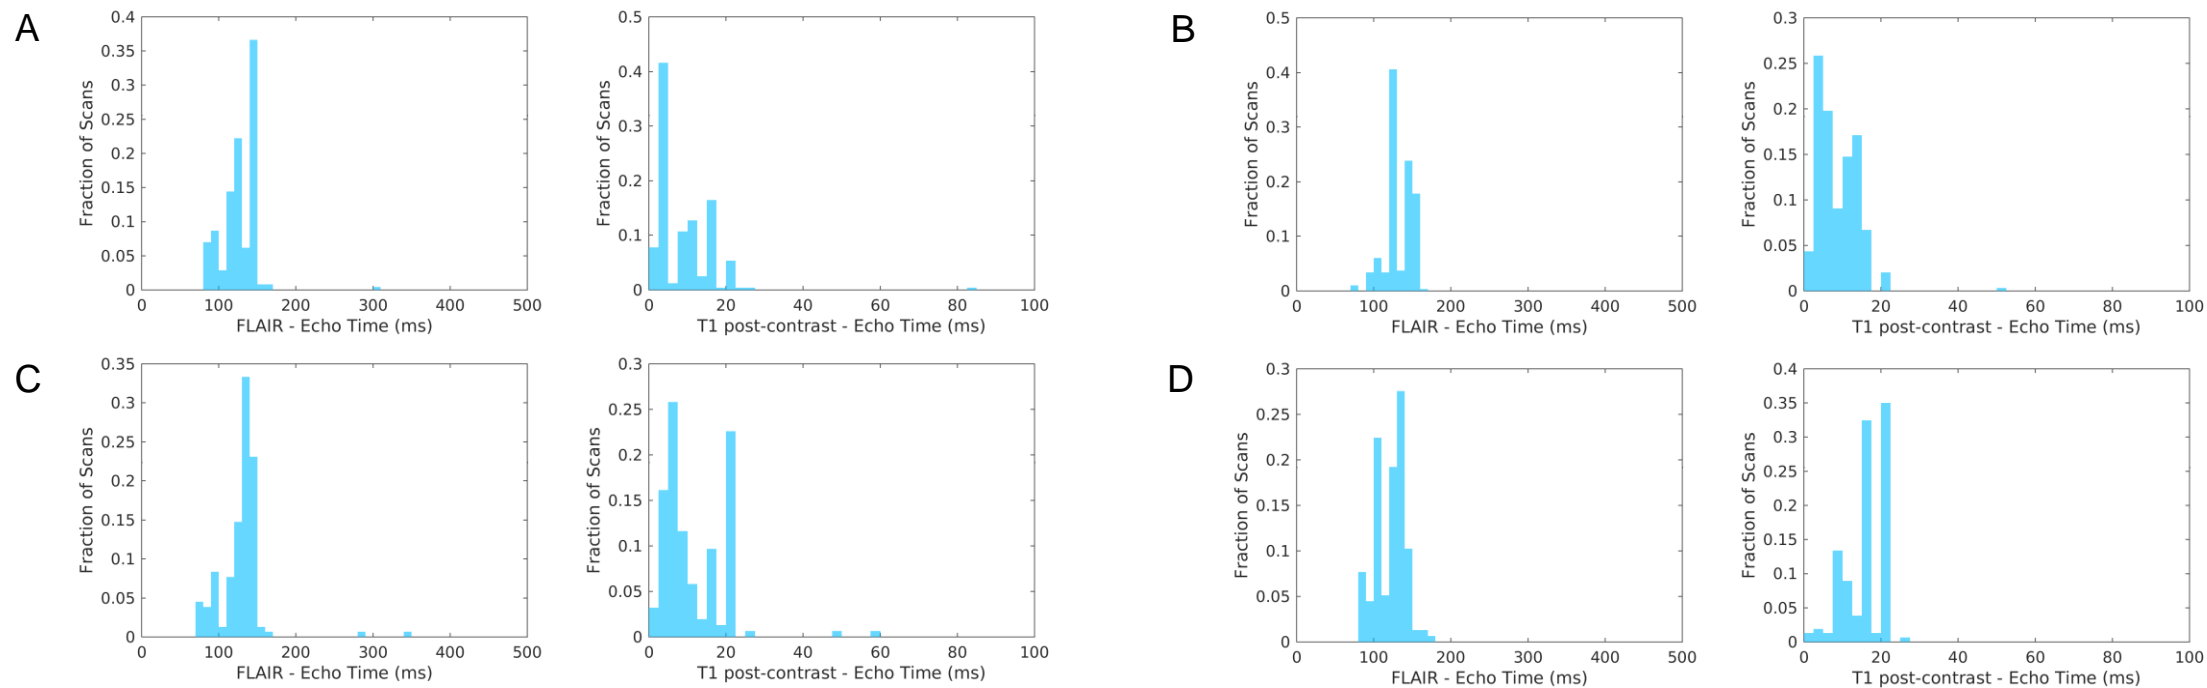

Supplementary Figure 2. Echo time for FLAIR and T1 post-contrast MRI images of (A) HUP, (B) TCIA, (C) MGH, and (D) BWH pre-operative cohorts.

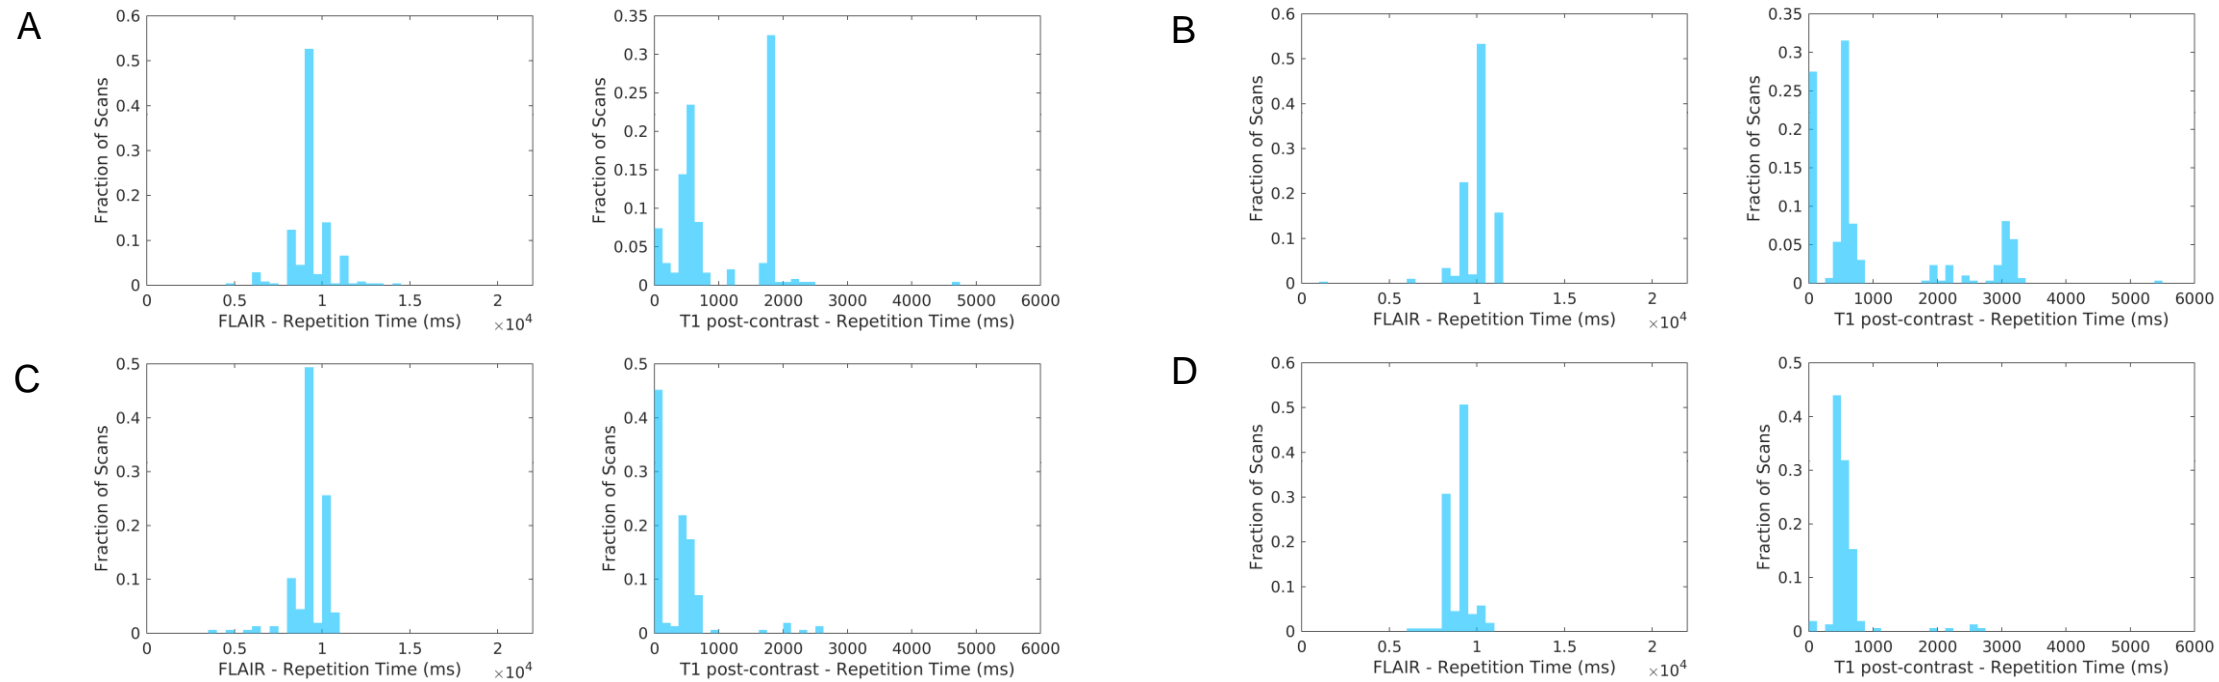

Supplementary Figure 3. Repetition time for FLAIR and T1 post-contrast MRI images of (A) HUP, (B) TCIA, (C) MGH, and (D) BWH pre-operative cohorts.

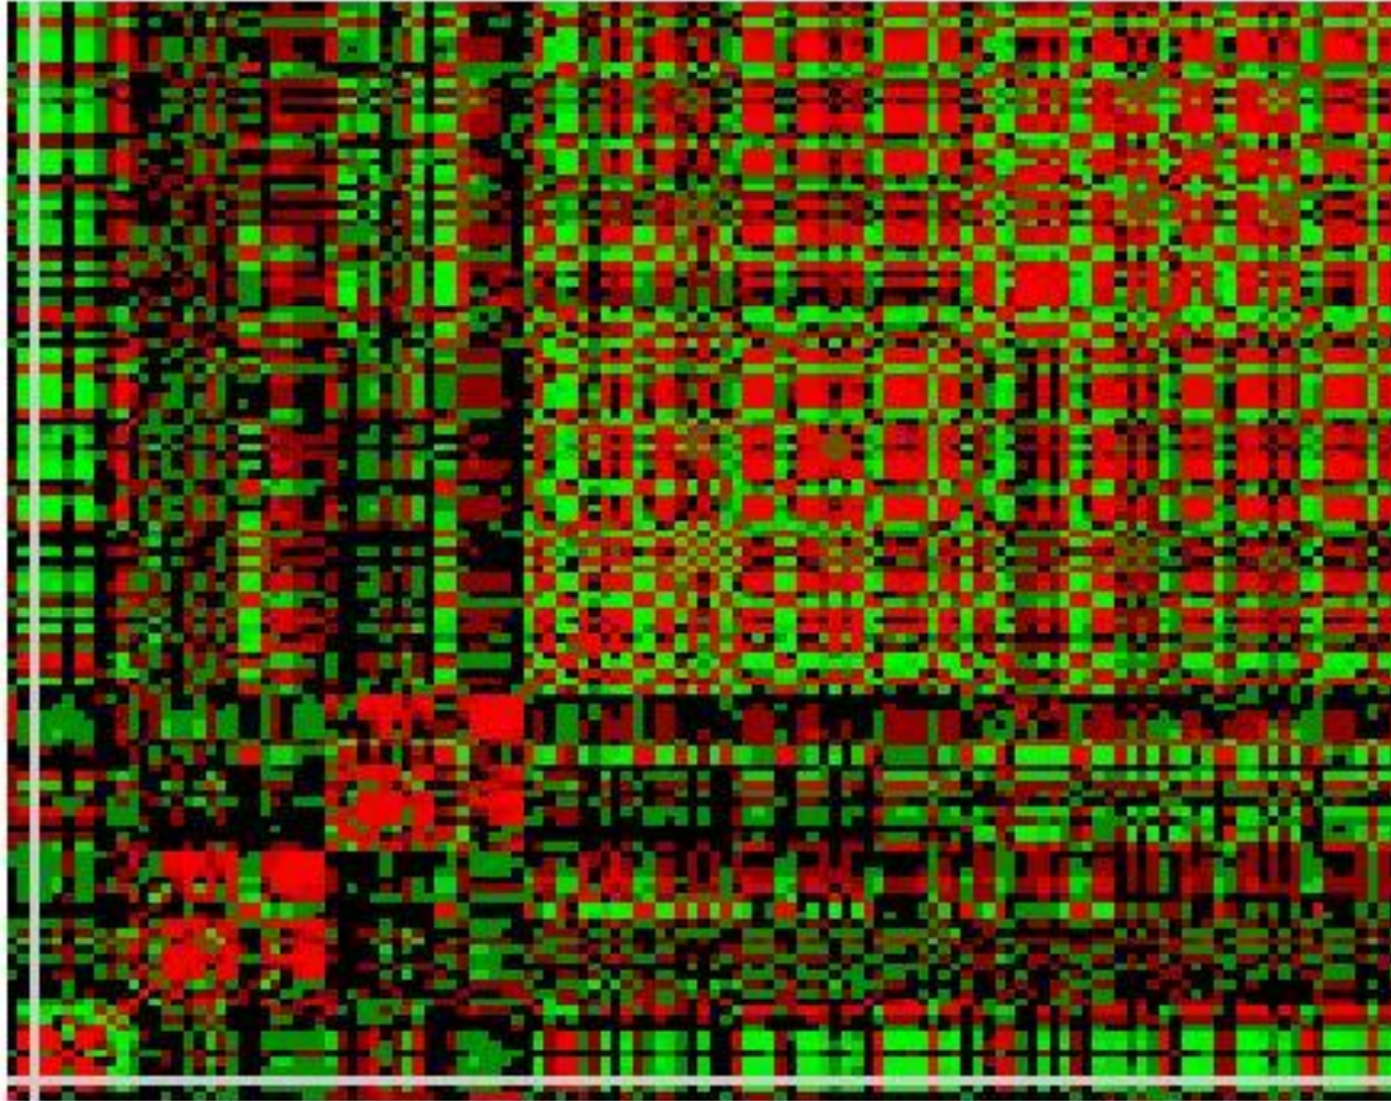

Supplementary Figure 4. The heatmap of Pearson correlations among all the radiomic features
